# Supplementary material for: Effects of solvent additive on “s-shaped” curves in solution-processed small molecule solar cells
Source: publisher site journal article supplement (doi:10.3762/bjoc.12.249), 2016-11-28
Supplement: Additional file 1 [file 1860-5397-12-249-S1.pdf]

# Supporting Information

for

## Effects of solvent additive on “s-shaped” curves in solution-processed small molecule solar cells

John A. Love<sup>1,2\*</sup>, Shu-Hua Chou<sup>1,3</sup>, Ye Huang<sup>1</sup>, Guillermo C. Bazan<sup>1\*</sup> and Thuc-Quyen Nguyen<sup>1\*</sup>

Address: <sup>1</sup>Center for Polymers and Organic Solids, University of California, Santa Barbara, California 93106, United States, <sup>2</sup>Institute of Physics and Astronomy, University of Potsdam, Potsdam-Golm 14476, Germany and <sup>3</sup>Department of Chemistry, National Taiwan University, Taipei, 10617, Taiwan

Email: John A. Love\* - [johnlove@uni-potsdam.de](mailto:johnlove@uni-potsdam.de) ; Guillermo C. Bazan\* - [bazan@chem.ucsb.edu](mailto:bazan@chem.ucsb.edu); Thuc-Quyen Nguyen\* - [quyen@chem.ucsb.edu](mailto:quyen@chem.ucsb.edu)

\*Corresponding author

### Detailed experimental procedures with physical and chemical analysis of compounds and additional device characterization data

#### Table of Contents:

|                                                              |     |
|--------------------------------------------------------------|-----|
| Materials and methods .....                                  | S3  |
| Synthetic procedure and characterization .....               | S5  |
| Molecular characterization.....                              | S9  |
| Differential scanning calorimetry (DSC).....                 | S9  |
| Table of photophysical and thermal characteristics .....     | S9  |
| Cyclic voltammetry.....                                      | S10 |
| Table of electrochemical and theoretical energy levels ..... | S10 |
| Device characterization .....                                | S11 |

|                                                                             |     |
|-----------------------------------------------------------------------------|-----|
| Light intensity dependent $J-V$ curves.....                                 | S11 |
| Grazing incidence wide angle X-ray scattering (GIWAXS).....                 | S11 |
| Atomic force microscopy (AFM) of blend films in standard architecture ..... | S12 |
| Hole mobility measurements .....                                            | S12 |
| $J-V$ characteristics of inverted solar cells processed with DIO .....      | S13 |
| AFM of blend films in inverted architecture .....                           | S14 |
| References.....                                                             | S14 |

## Materials and methods

**Materials.** All chemicals and reagents were commercially available and used as received. Anhydrous tetrahydrofuran and toluene for chemical reactions were obtained by passing through solvent dispensing systems. 4,7-Dibromo-5-fluorobenzo[*c*][1,2,5]-thiadiazole was purchased from 1-Material Inc. and used without further purification as received. Benzo-[1,2-*b*:4,5-*b'*]-bis-(2-bromo-4,4'-dihexyl-4*H*-silolo[3,2-*b*]-thiophene <sup>1</sup> and (*E*)-octyl-3-(5-bromothiophen-2-yl)-2-cyanoacrylate <sup>2</sup> were synthesized according to the literatures.

**Nuclear magnetic resonance (NMR) spectroscopy.** <sup>1</sup>H NMR were recorded on a Varian Unity Inova 500 MHz or 600 MHz spectrometer and <sup>13</sup>C NMR were performed on a Varian Unity Inova 500 MHz or Bruker Avance 800 MHz spectrometer at room temperature using deuteriochloroform (or other given solvents) as internal reference. Chemical shifts are reported as  $\delta$  values (ppm) relative to an internal tetramethylsilane (TMS) standard. 2D <sup>1</sup>H-<sup>1</sup>H NOESY correlation experiments were acquired on a Varian Unity Inova 600MHz spectrometer at 25 °C for elucidating the fluorine regiochemistry of compound **2**.

**Mass spectrometry (MS).** Low-resolution field-desorption time-of-flight (FD-TOF) MS was performed on a Waters GCT Premier and high-resolution electrospray (ESI) MS was measured on a Waters Micromass QTOF2. All MS spectra were collected by the UCSB Department of Chemistry and Biochemistry Mass Spectrometry Facility.

**Differential scanning calorimetry (DSC).** The melting and crystallization temperatures were measured using a TA Instrument DSC (Model Q-2000) with a scan rate of 10 °C/min.

**Cyclic voltammetry (CV).** Solution electrochemical properties were performed using a CHI instrument model 730B in a three-electrode electrochemical cell with a glassy carbon working electrode, a Pt wire counter electrode, and a Ag wire pseudo reference electrode. CH<sub>2</sub>Cl<sub>2</sub> was purified by distillation for cyclic voltammetry measurement. Redox potentials were measured in anhydrous CH<sub>2</sub>Cl<sub>2</sub> with 0.1 M tetrabutylammonium hexafluorophosphate (TBAPF<sub>6</sub>) as a supporting electrolyte, and product concentration was kept at 1 mg·mL<sup>-1</sup>. All potentials

reported here were calibrated with the ferrocene/ferrocenium redox couple ( $\text{Fc}/\text{Fc}^+$ ) as internal standard. The corresponding HOMO and LUMO energy levels were acquired by correlating the onsets of oxidation and reduction to the Normal Hydrogen Electrode (NHE), assuming HOMO of  $\text{Fc}/\text{Fc}^+$  to be 4.88 eV.

**UV-visible absorption measurement.** UV-vis spectra were recorded with a Beckman Coulter DU 800 series or a Perkin Elmer Lambda 750 spectrophotometer. All solution UV-Vis experiments were measured in  $\text{CHCl}_3$ . Neat films were prepared by spin-coating at a spin speed of 1500 rpm from 10 mg/mL  $\text{CHCl}_3$  solutions atop pre-cleaned glass substrates. Films were annealed on a hot plate for 2 minutes at given temperatures and cooled to room temperature for absorption measurements.

**Solubility measurements.** Prepared the calibration curve by measuring the absorbance of different solutions in  $\text{CHCl}_3$  with a known concentration, and plotting  $\lambda_{\text{max}}$  vs. concentration, a linear relationship was observed. An over-saturated  $\text{CHCl}_3$  solution was stirred vigorously for 48 hours at room temperature. The slurry was then filtered through a 0.45  $\mu\text{m}$  PTFE filter. The filtrate was assumed to be a saturated solution. A 100  $\mu\text{L}$  aliquot was then diluted to 50 mL with  $\text{CHCl}_3$ . The UV-vis absorption spectrum was obtained and the concentration was determined using its standard calibration curve.

**DFT theoretical calculations.** The molecular geometry and photophysical properties of  $\text{p-SiDT}(\text{FBTThCA8})_2$  at the molecular level were performed by Gaussian 09 program, in which the conformation of ground state and HOMO/LUMO orbitals were optimized by the density functional theory (DFT) using Beck's three-parameterized Lee-Yang-Parr exchange functional (B3LYP) with 6-311G(d,p) basis sets.

**GIWAXS measurement.** Grazing Incidence Wide Angle X-ray Scattering (GIWAXS) patterns were collected at the Stanford Synchrotron Radiation Lightsource (SSRL) beamline 11-3 with an X-ray wavelength of 0.9752  $\text{\AA}$ , at a 40 cm sample to detector distance at an incident angle of 0.12°. Samples were probed under a helium environment to minimize beam damage and reduce diffuse scattering. The measurements were calibrated using a LaB6

standard. Thin films were prepared by spin-coating from chloroform solution (10 mg/mL) atop silicon substrates at 1000 rpm.

## Synthetic procedure and characterization

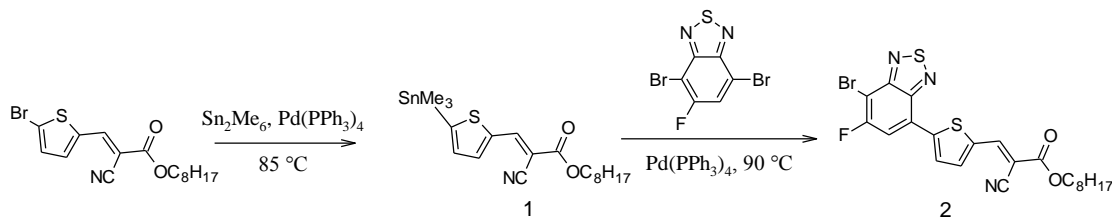

*Synthesis of (E)-octyl 3-(5-(7-bromo-6-fluorobenzo[c][1,2,5]thiadiazol-4-yl)thiophen-2-yl)-2-cyanoacrylate (2).* In a  $\text{N}_2$  filled glove box, hexamethylditin (982.8 mg, 3.0 mmol), (E)-octyl 3-(5-bromothiophen-2-yl)-2-cyanoacrylate (740.6 mg, 2.0 mmol),  $\text{Pd}(\text{PPh}_3)_4$  (115.5 mg, 0.1 mmol), and dry toluene (20 mL) were combined in a 50 mL round bottle and then sealed. The reaction mixture was stirred and heated at  $85\text{ }^\circ\text{C}$  for 18 hours. After cooling to room temperature, the solvent and excess amounts of hexamethylditin were removed by rotary evaporation. The crude material (E)-octyl 2-cyano-3-(5-(trimethylstannyl)thiophen-2-yl)acrylate (**1**) was used for the following procedure without further purification. A 50 mL round bottle was charged with crude **1**, 4,7-dibromo-5-fluorobenzo[c][1,2,5]thiadiazole (592.7 mg, 1.9 mmol),  $\text{Pd}(\text{PPh}_3)_4$  (87.8 mg, 0.076 mmol) and dry toluene (30 mL) in a  $\text{N}_2$  filled glove box. The reaction mixture was then sealed and stirred at  $90\text{ }^\circ\text{C}$  for 3 days. Upon cooling, the solvent was removed in vacuo. The crude product was purified by column chromatography on silica gel with gradient eluent from  $\text{CH}_2\text{Cl}_2$ /hexane (v/v, 1:3) to  $\text{CH}_2\text{Cl}_2$ /hexane (v/v, 1:1). The product was washed with MeOH and then dried under vacuum overnight. The desired product **2** was obtained as yellow solid (425 mg, 42.8%).  $^1\text{H}$  NMR (600 MHz,  $\text{CDCl}_3$ ,  $\delta$ ): 8.34 (s, 1H), 8.22 (d,  $J = 6\text{ Hz}$ , 1H), 7.89 (d,  $J = 6\text{ Hz}$ , 1H), 7.86 (d,  $J = 12\text{ Hz}$ , 1H), 4.32 (t,  $J = 6\text{ Hz}$ , 2H), 1.77 (q,  $J = 7.5\text{ Hz}$ , 2H), 1.45-1.41 (m, 2H), 1.34-1.28 (m, 8H), 0.89 (t,  $J = 6\text{ Hz}$ , 3H).  $^{13}\text{C}$  NMR (125 MHz,  $\text{CDCl}_3$ ,  $\delta$ ): 162.7, 161.6, 159.5, 154.4, 154.3, 148.7, 145.9, 138.0, 137.8, 129.7, 125.8, 118.0, 117.7, 115.8, 100.5, 99.3, 99.1, 67.1, 31.9, 29.4, 29.3, 28.7, 26.0, 22.8, 14.3. HRMS (ESI-TOF)  $m/z$ , calcd for  $\text{C}_{22}\text{H}_{21}\text{BrFN}_3\text{NaO}_2\text{S}_2$   $[\text{M}+\text{Na}]^+$ : 544.0140; found: 544.0118.

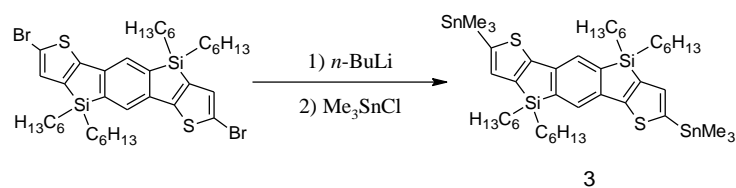

*Synthesis of benzo[1,2-*b*:4,5-*b'*]bis(2-trimethylstannyl-4,4'-dihexyl-4*H*-silolo[3,2-*b*]thiophene) (3).* *n*-BuLi (1.6 M in hexane, 1.4 mL, 2.3 mmol) was injected dropwise via a syringe into a solution of benzo[1,2-*b*:4,5-*b'*]bis-(2-bromo-4,4'-dihexyl-4*H*-silolo[3,2-*b*]thiophene (793 mg, 1.0 mmol) in anhydrous THF (100 mL) at  $-78\text{ }^{\circ}\text{C}$  under  $\text{N}_2$ . The mixture was stirred at  $-78\text{ }^{\circ}\text{C}$  for 10 min and then a solution of trimethyltin chloride (498.2 mg in 3.5 mL dry THF, 2.5 mmol) was added quickly in one portion at  $-78\text{ }^{\circ}\text{C}$ . The reaction was stirred at room temperature for another 4 hours. Water was added to the reaction mixture and extracted with hexanes. The combined organic layer was dried over anhydrous  $\text{MgSO}_4$  and the solvent was removed in vacuo. The solid was precipitated out in iced MeOH solution and filtered. Compound **3** was collected as pale yellow solid (950 mg, 98.9%).  $^1\text{H}$  NMR (600 MHz,  $\text{CDCl}_3$ ,  $\delta$ ): 7.57 (s, 1H), 7.16 (s, 1H), 1.44-1.39 (m, 4H), 1.32-1.21 (m, 12H), 0.98-0.89 (m, 4H), 0.85-0.83 (m, 6H), 0.4 (s, 9H).  $^{13}\text{C}$  NMR (125 MHz,  $\text{CDCl}_3$ ,  $\delta$ ): 163.3, 142.4, 142.2, 140.7, 138.8, 138.0, 125.7, 33.2, 31.6, 24.3, 22.8, 14.3, 12.4, -7.9. LRMS (FD-TOF)  $m/z$ , calcd for  $\text{C}_{44}\text{H}_{74}\text{S}_2\text{Si}_2\text{Sn}_2$   $[\text{M}]^+$ : 962.28; found: 962.28.

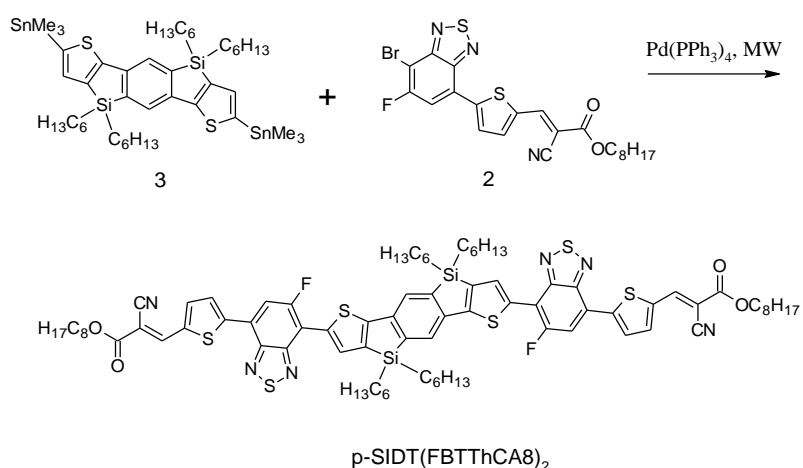

*Synthesis of p-SIDT(FBTThCA8)<sub>2</sub>.* To a 20 mL microwave vial was added compound **2** (493 mg, 0.94 mmol), compound **3** (432 mg, 0.45 mmol),  $\text{Pd}(\text{PPh}_3)_4$  (26 mg, 0.023 mmol), and dry toluene (13 mL) in a  $\text{N}_2$  filled glove box. The reaction vial was sealed and loaded in a

Biotage microwave reactor with conditions as follows: 100 °C for 5 minutes, 120 °C for 5 minutes, 140 °C for 10 minutes and 170 °C for 50 minutes. Upon cooling, the volatiles were removed in vacuo. The crude product was purified through silica gel column with gradient eluent from CHCl<sub>3</sub>/hexane (v/v, 1:1) to pure CHCl<sub>3</sub>. Purification by column chromatography was carried out several times to ensure purity for device fabrication. The solid was reprecipitated and filtered with DCM/MeOH, DCM/pentane and DCM/ethylacetate sequentially. **p-SIDT(FBTThCA8)<sub>2</sub>** (550 mg, 80.6%) was then obtained as bronze-colored solid after dried under vacuum for 24 hours. <sup>1</sup>H NMR (500 MHz, CDCl<sub>3</sub>, δ): 8.41 (s, 2H), 8.33 (s, 2H), 8.24 (d, *J* = 5 Hz, 2H), 7.95 (d, *J* = 15 Hz, 2H), 7.88 (d, *J* = 5 Hz, 2H), 7.77 (s, 2H), 4.31 (t, *J* = 5 Hz, 4H), 1.80-1.74 (m, 4H), 1.53-1.46 (m, 8H), 1.45-1.41 (m, 4H), 1.39-1.25 (m, 40H), 1.12-1.01 (m, 8H), 0.91-0.84 (m, 18H). <sup>13</sup>C NMR (200 MHz, CDCl<sub>3</sub>, δ): 163.0, 160.9, 160.8, 159.0, 157.7, 153.4, 153.3, 149.8, 147.4, 147.3, 146.1, 143.2, 142.9, 140.7, 138.2, 137.1, 134.7, 134.6, 134.1, 134.0, 129.0, 126.0, 123.0, 122.9, 118.9, 118.8, 116.1, 114.4, 114.3, 99.5, 67.0, 33.2, 32.0, 31.7, 29.4, 29.3, 28.8, 26.0, 24.3, 22.9, 22.8, 14.3, 14.2, 12.4. LRMS (FD-TOF) *m/z*, calcd for C<sub>82</sub>H<sub>98</sub>F<sub>2</sub>N<sub>6</sub>O<sub>4</sub>S<sub>6</sub>Si<sub>2</sub> [M]<sup>+</sup>: 1516.55; found: 1516.46.

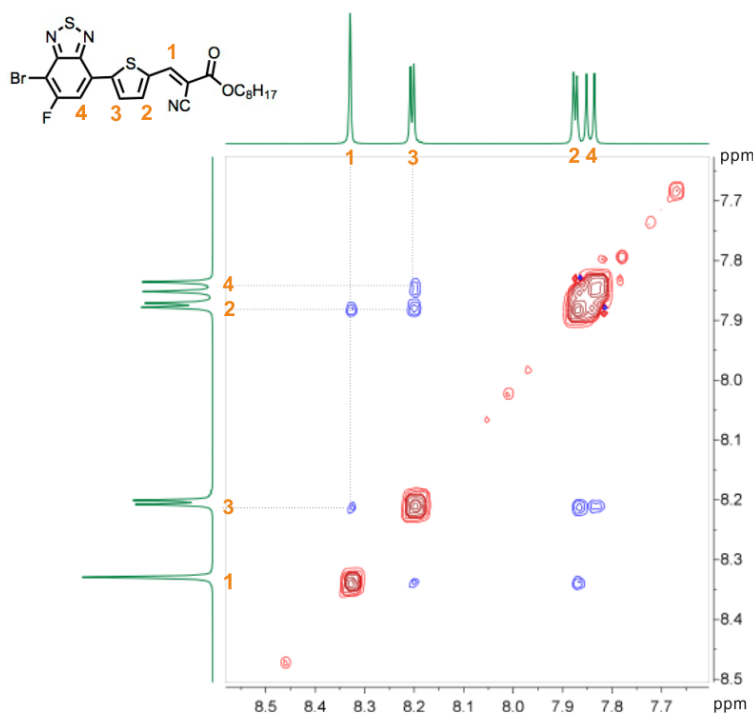

**Figure S1:** 2D <sup>1</sup>H-<sup>1</sup>H NOESY spectrum of compound **2** in CDCl<sub>3</sub> expands to the selected aromatic region and the assignment of its regiochemistry.

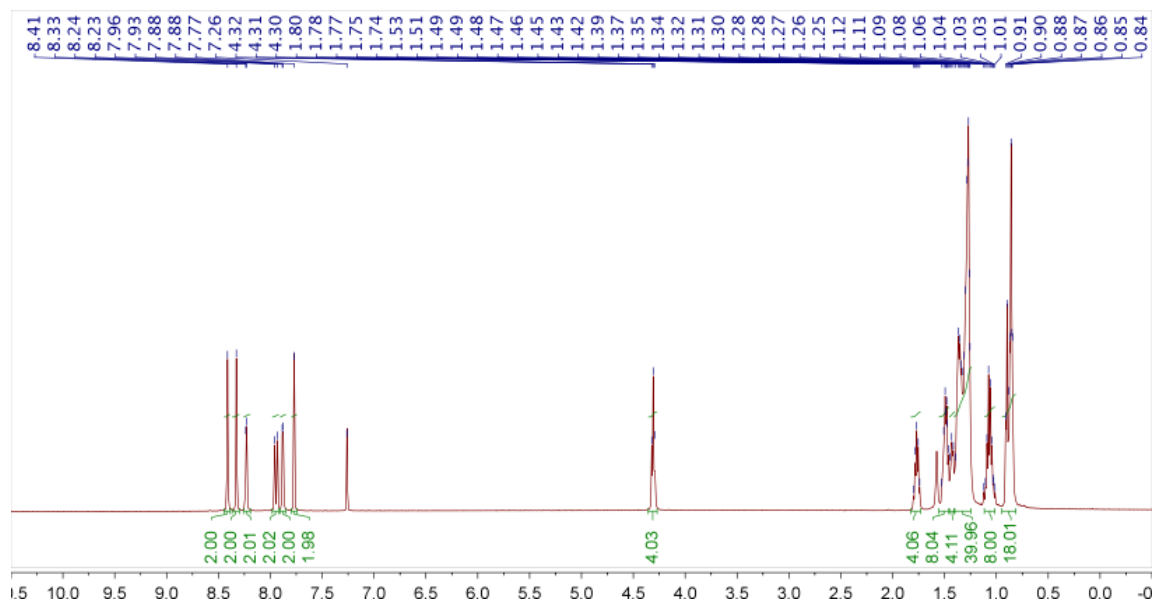

**Figure S2.**  $^1\text{H}$  NMR spectrum of p-SIDT(FBTThCA8)<sub>2</sub> in  $\text{CDCl}_3$ .

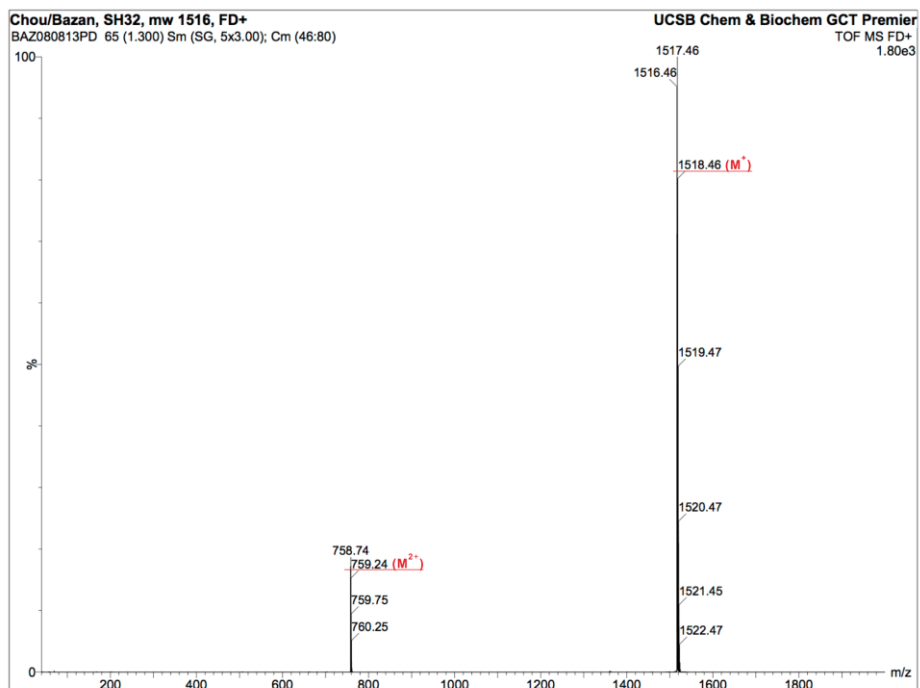

**Figure S3:** FD-TOF MS of p-SIDT(FBTThCA8)<sub>2</sub>, showing double-charged species ( $M^{2+}$ ).



## Molecular characterization

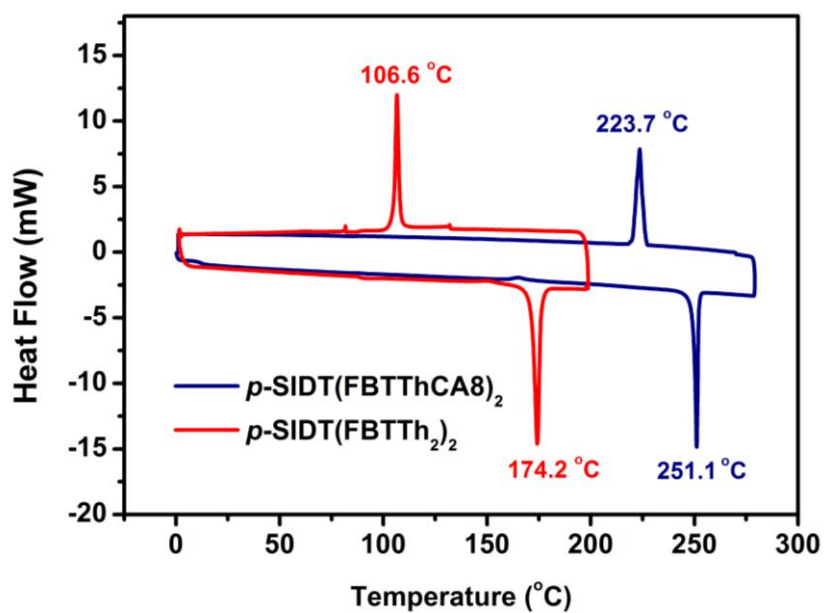

**Figure S4:** DSC thermograms showing melting ( $T_m$ ) and crystallization ( $T_c$ ) temperatures of p-SIDT(FBTThCA8)<sub>2</sub> and p-SIDT(FBTTh<sub>2</sub>)<sub>2</sub>.

**Table S1:** Photophysical and thermal characteristics of p-SIDT(FBTThCA8)<sub>2</sub> and p-SIDT(FBTTh<sub>2</sub>)<sub>2</sub>.

| Molecule                                 | solution absorption <sup>a</sup> |                                                        | film absorption          |                                       | thermal transitions |
|------------------------------------------|----------------------------------|--------------------------------------------------------|--------------------------|---------------------------------------|---------------------|
|                                          | $\lambda_{\max}$<br>(nm)         | $\epsilon$ ( $\lambda_{\max}$ )<br>( $M^{-1}cm^{-1}$ ) | $\lambda_{\max}$<br>(nm) | $\Delta E^{opt}$<br>(eV) <sup>b</sup> | $T_m/T_c$<br>(°C)   |
| p-SIDT(FBTThCA8) <sub>2</sub>            | 603                              | 96630                                                  | 650                      | 1.65                                  | 223.7/ 251.1        |
| p-SIDT(FBTTh <sub>2</sub> ) <sub>2</sub> | 571                              | 65000                                                  | 610                      | 1.93                                  | 106.6/ 174.2        |

<sup>a</sup> Measured in CHCl<sub>3</sub> at room temperature; <sup>b</sup> obtained from the absorption onsets in the films.

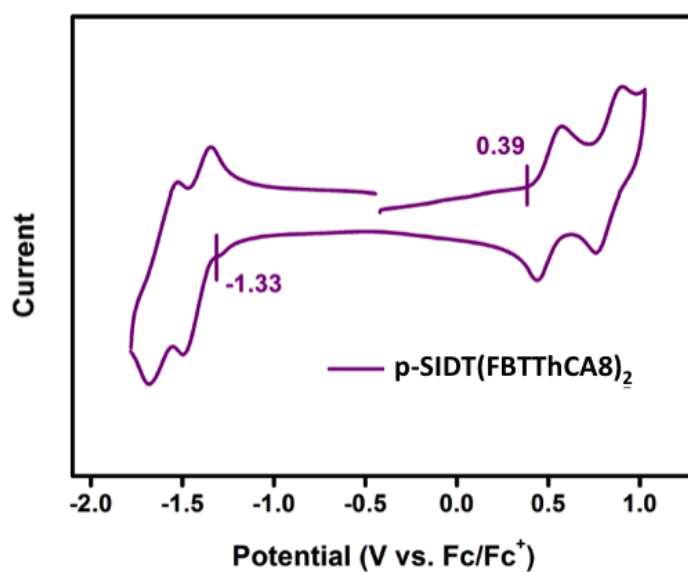

**Figure S5:** Cyclic voltammetry of p-SIDT(FBTThCA8)<sub>2</sub>.

**Table S2:** Electrochemical and theoretical energy levels of p-SIDT(FBTThCA8)<sub>2</sub> and p-SIDT(FBTTh<sub>2</sub>)<sub>2</sub>.

| Molecule                                 | Energy levels                                                               |                                                                              |
|------------------------------------------|-----------------------------------------------------------------------------|------------------------------------------------------------------------------|
|                                          | $E_{\text{HOMO}}/E_{\text{LUMO}}/\Delta E^{\text{CV}}$<br>(eV) <sup>a</sup> | $E_{\text{HOMO}}/E_{\text{LUMO}}/\Delta E^{\text{DFT}}$<br>(eV) <sup>b</sup> |
| p-SIDT(FBTThCA8) <sub>2</sub>            | -5.27/-3.55/1.72                                                            | -5.43/-3.53/1.90                                                             |
| p-SIDT(FBTTh <sub>2</sub> ) <sub>2</sub> | -5.21/-3.36/1.85                                                            | -4.97/-2.96/2.01                                                             |

<sup>a</sup>Determined by CV experiment; <sup>b</sup>calculated by the DFT theoretical simulation of optimized geometry.

## Device characterization

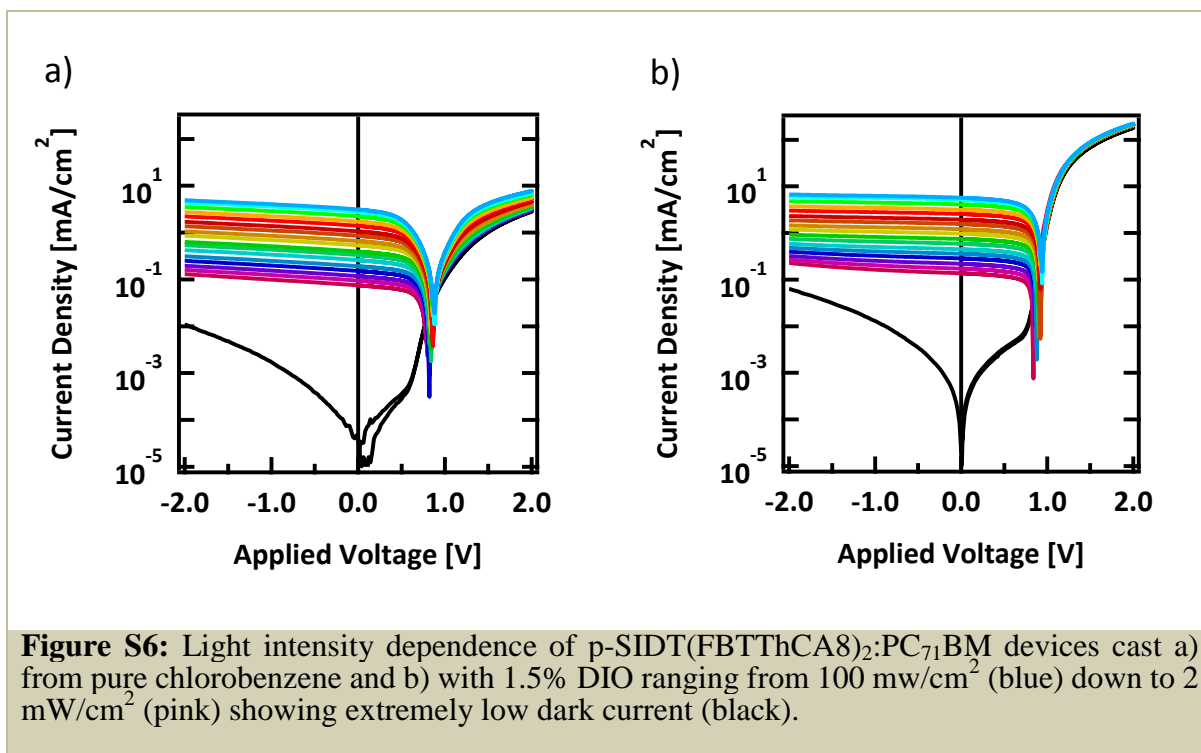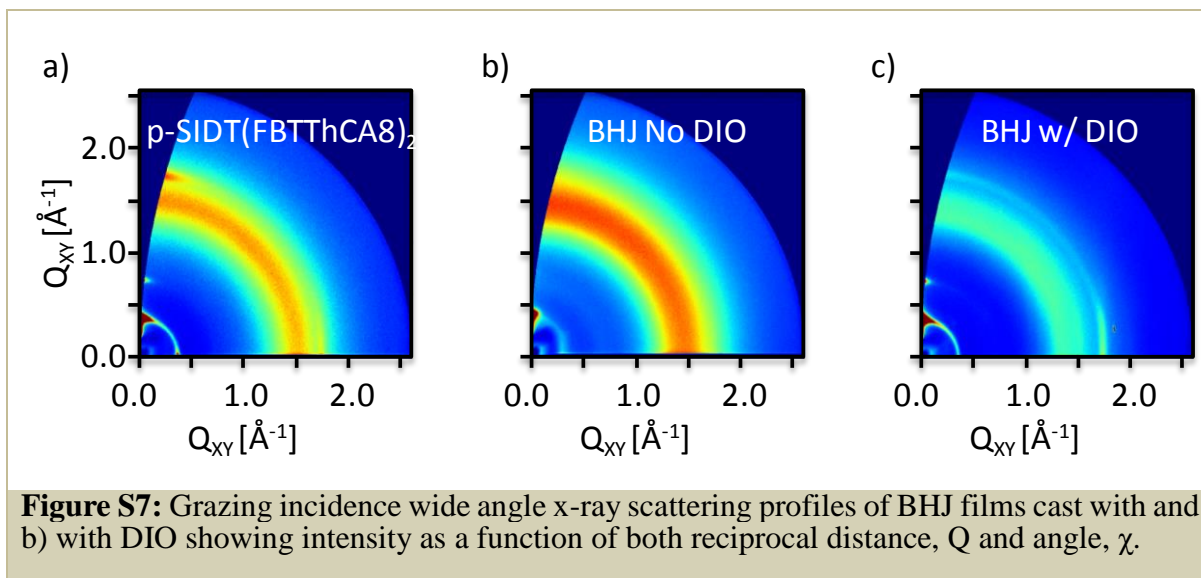

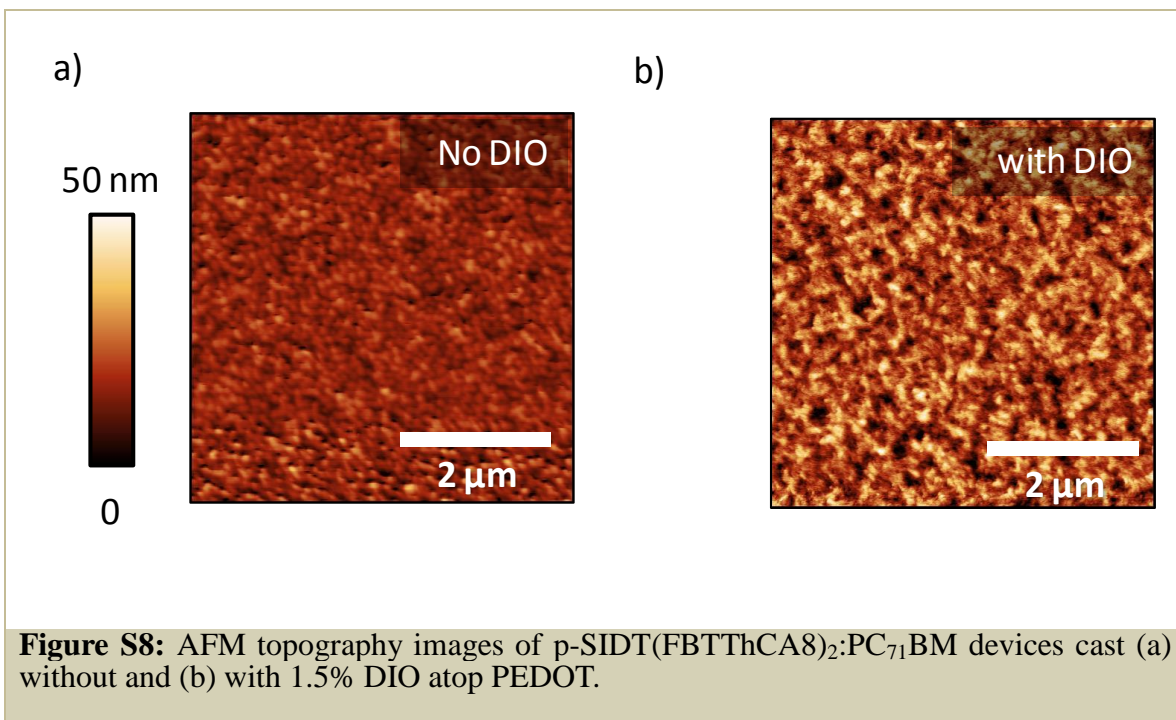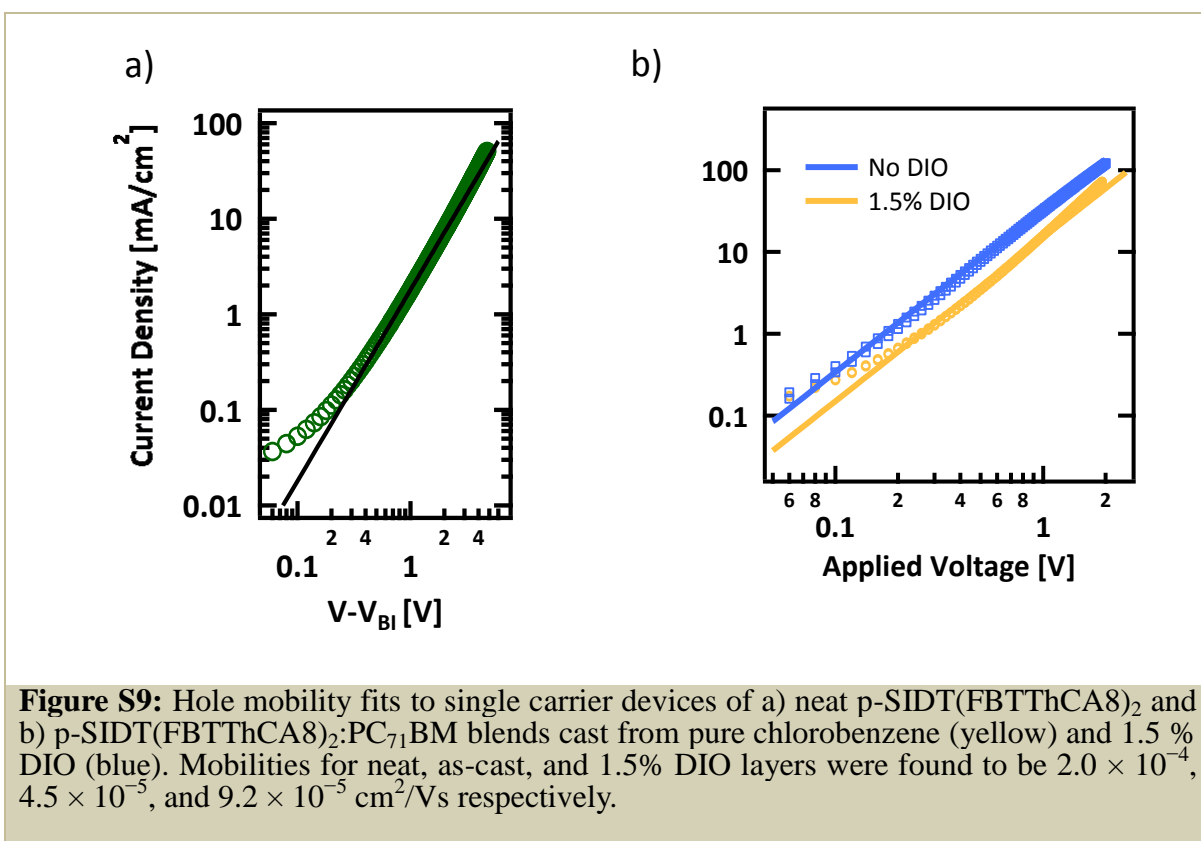

Hole only devices were fabricated for pristine p-SIDT(FBTThCA8)<sub>2</sub> and BHJ blends according to the structure ITO/PEDOT/active layer/MoO<sub>3</sub>/Ag. The *J–V* characteristics of the

devices were measured in the dark. Injection current from the MoO<sub>3</sub> top contact was fit according to the Mott–Gurney Law for space charge limited current:

$$J = \frac{9}{8} \varepsilon_0 \varepsilon_r \mu_p \frac{V^2}{L^3}$$

where  $\varepsilon_0$  is the vacuum permittivity,  $\varepsilon_r$  is the relative dielectric of the active layer (assumed to be 3 in all cases),  $\mu_p$  is the hole mobility  $V$  is the applied voltage minus a small built in voltage, and  $L$  is the active layer thickness, which for neat p-SIDT(FBTThCA8)<sub>2</sub> was varied between 250 and 350 nm and for BHJ blends were kept at 120 nm as in solar cells.

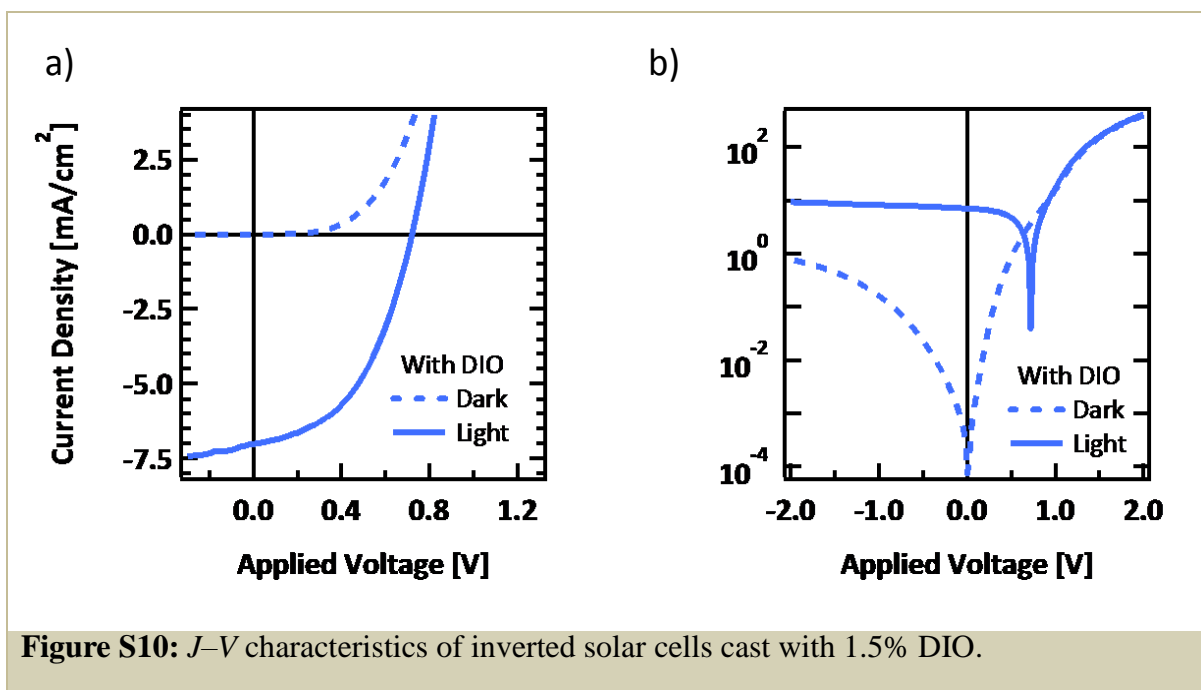

**Figure S10:**  $J$ – $V$  characteristics of inverted solar cells cast with 1.5% DIO.

When the p-SIDT(FBTThCA8)<sub>2</sub>:PC<sub>71</sub>BM layer was cast with 1.5% DIO in the inverted architecture of ITO/ZnO/PEIE/BHJ/MoO<sub>3</sub>/Al devices showed large dark current as shown above in Figure S10. Unfortunately this leads to extremely low  $V_{OC}$  and  $FF$  leading to low performance despite improved photocurrent compared to the standard architecture.

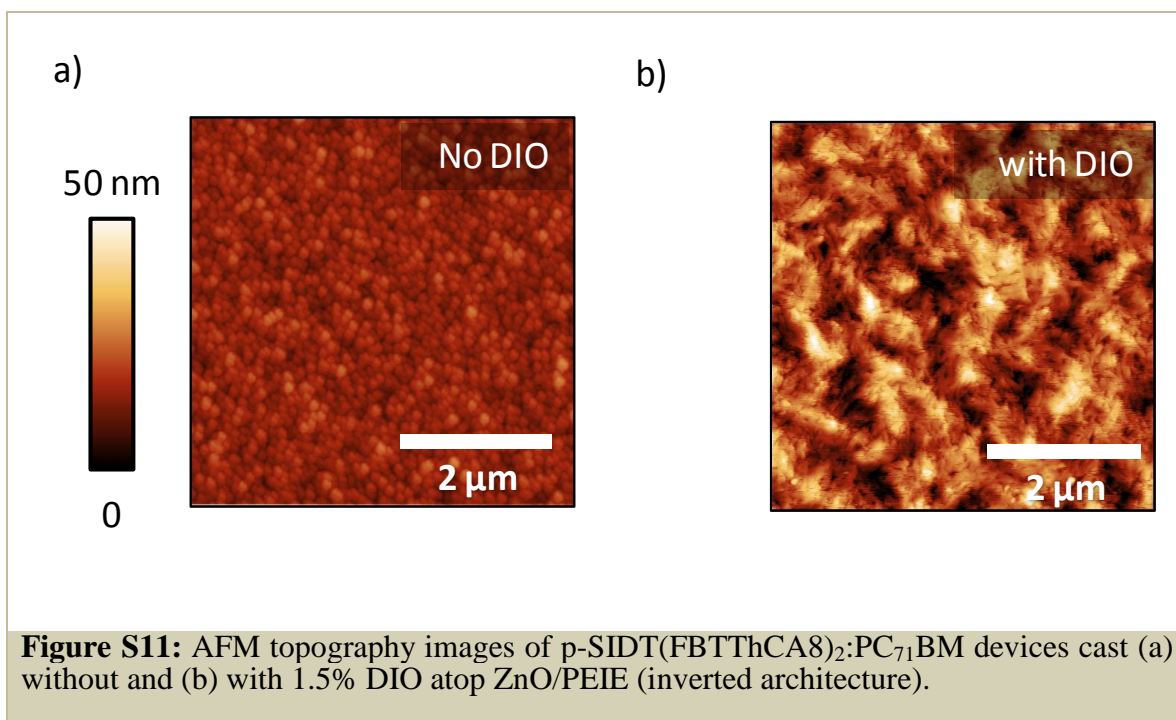

The high dark current observed for 1.5% DIO inverted devices likely is due to a change in morphology caused by casting atop the different substrates.. When the p-SIDT(FBTThCA8)<sub>2</sub>:PC<sub>71</sub>BM is cast with 1.5% DIO on ZnO/PEIE substrates (Figure S11 b), the roughness and size scale of the features increases dramatically. Films cast without additive, from pure chlorobenzene, show smoother, surfaces (RMS roughness < 3 nm) regardless of underlying substrate.

## References

- <sup>1</sup> J. A. Love, I. Nagao, Y. Huang, M. Kuik, V. Gupta, C. J. Takacs, J. E. Coughlin, L. Qi, T. S. van der Poll, E. J. Kramer, A. J. Heeger, T.-Q. Nguyen, G. C. Bazan, *J. Am. Chem. Soc.* **2014**, DOI 10.1021/ja412473p
- <sup>2</sup> Y. Lin, Z.-G. Zhang, H. Bai, Y. Li, X. Zhan, *Chem. Commun.* **2012**, 48, 9655.
